# Supplementary material for: From bench to bedside: Improving the clinical safety of GalNAc–siRNA conjugates using seed-pairing destabilization
Source: PubMed Central journal article supplement — Nucleic Acids Res. 2022 Jun 23;50(12):6656–70. doi: 10.1093/nar/gkac539 (PMC9262600; doi:10.1093/nar/gkac539), 2022-06-23
Supplement: gkac539_supplemental_file.pdf [file gkac539_supplemental_file.pdf]

**Supporting Information****From Bench to Bedside: Improving the Clinical Safety of GalNAc-siRNA Conjugates Using Seed-Pairing Destabilization**

Mark K. Schlegel<sup>1†</sup>, Maja M. Janas<sup>1†</sup>, Yongfeng Jiang<sup>1</sup>, Joseph D. Barry<sup>1</sup>, Wendell Davis<sup>1</sup>, Saket Agarwal<sup>1</sup>, Daniel Berman<sup>1</sup>, Christopher R. Brown<sup>1</sup>, Adam Castoreno<sup>1</sup>, Sarah LeBlanc<sup>1</sup>, Abigail Liebow<sup>1</sup>, Tara Mayo<sup>1</sup>, Stuart Milstein<sup>1</sup>, Tuyen Nguyen<sup>1</sup>, Svetlana Shulga-Morskaya<sup>1</sup>, Sarah Hyde<sup>1</sup>, Sally Schofield<sup>1</sup>, John Szeto<sup>1</sup>, Lauren Blair Woods<sup>1</sup>, Vedat O. Yilmaz<sup>1</sup>, Muthiah Manoharan<sup>1</sup>, Martin Egli<sup>2</sup>, Klaus Charissé<sup>1</sup>, Laura Sepp-Lorenzino<sup>1</sup>, Patrick Haslett<sup>1</sup>, Kevin Fitzgerald<sup>1</sup>, Vasant Jadhav<sup>1</sup>, Martin A. Maier<sup>1\*</sup>

<sup>1</sup> Alnylam Pharmaceuticals, 300 Third Street, Cambridge, Massachusetts 02142

<sup>2</sup> Department of Biochemistry, School of Medicine, Vanderbilt University, Nashville, TN 37232, USA

\*Corresponding author: [mmaier@alnylam.com](mailto:mmaier@alnylam.com)

**Table of Contents**

|                                                                                   |     |
|-----------------------------------------------------------------------------------|-----|
| 1. Sequences of siRNAs.....                                                       | S2  |
| 2. Dose response of selected siRNAs in rats.....                                  | S3  |
| 3. Metabolism identification and test article quantification in mouse liver.....  | S4  |
| 4. <i>In vitro</i> off-target silencing of DNA-modified siRNAs.....               | S5  |
| 5. Additional single-dose knockdown data in mice .....                            | S6  |
| 6. Clinical pathology graphs and tables .....                                     | S7  |
| 7. Microscopic liver findings in rats .....                                       | S12 |
| 8. Therapeutic index calculation .....                                            | S14 |
| 9. <i>In vivo</i> RNAseq MA plots, CDF plots, and DEG counts.....                 | S15 |
| 10. Pharmacodynamics of GalNAc-siRNAs containing 2'-5'-RNA linkages.....          | S21 |
| 11. <i>In vitro</i> off-target silencing of 2'-5'-RNA modified siRNAs.....        | S22 |
| 12. <i>In vitro</i> CDF plots after treatment with 2'-5'-RNA modified siRNAs..... | S23 |
| 13. Additional PD and RNAseq data with HBV-targeting GalNAc-siRNAs.....           | S24 |
| 14. Overview of published hAgo2 structural data .....                             | S26 |
| 15. References.....                                                               | S28 |

**Sequences of siRNAs****Table S1.** siRNA duplexes used in these studies

| Duplex    | mRNA Target | Passenger | Sequence (5' to 3')      | Guide | Sequence (5' to 3')                   |
|-----------|-------------|-----------|--------------------------|-------|---------------------------------------|
| D1        | <i>Ttr</i>  | P1        | a●a●caguGuUCUugcucuauaaL | G1    | u●U●auaGagcaagaAcAcuguu●u●u           |
| D2        | <i>Ttr</i>  | P1        | a●a●caguGuUCUugcucuauaaL | G2    | u●U●au <u>A</u> GagcaagaAcAcuguu●u●u  |
| D3        | <i>Ttr</i>  | P1        | a●a●caguGuUCUugcucuauaaL | G3    | u●U●aua <u>G</u> agcaagaAcAcuguu●u●u  |
| D4        | <i>Ttr</i>  | P1        | a●a●caguGuUCUugcucuauaaL | G4    | u●U●auaG <u>A</u> gcaagaAcAcuguu●u●u  |
| D5        | <i>Ttr</i>  | P1        | a●a●caguGuUCUugcucuauaaL | G5    | u●U●auaGa <u>G</u> caagaAcAcuguu●u●u  |
| D6        | <i>Hao1</i> | P2        | g●a●auguGaaAGucaucgacaaL | G7    | u●U●gucGaUGacuuUcAcauuc●u●g           |
| D7        | <i>Hao1</i> | P2        | g●a●auguGaaAGucaucgacaaL | G8    | u●U●gu <u>C</u> GaUGacuuUcAcauuc●u●g  |
| D8        | <i>Hao1</i> | P2        | g●a●auguGaaAGucaucgacaaL | G9    | u●U●guc <u>G</u> aUGacuuUcAcauuc●u●g  |
| D9        | <i>Hao1</i> | P2        | g●a●auguGaaAGucaucgacaaL | G10   | u●U●gucG <u>A</u> UGacuuUcAcauuc●u●g  |
| D10       | <i>Hao1</i> | P2        | g●a●auguGaaAGucaucgacaaL | G11   | u●U●gucGa <u>I</u> UGacuuUcAcauuc●u●g |
| D11       | <i>Ttr</i>  | P1        | a●a●caguGuUCUugcucuauaaL | G6    | u●U●a <u>t</u> agagcaagaAcAcuguu●u●u  |
| D12       | <i>Hao1</i> | P2        | g●a●auguGaaAGucaucgacaaL | G12   | u●U●g <u>t</u> cgatGacuuUcAcauuc●u●g  |
| ALN-HBV   | HBV         | P3        | g●u●guGcACUucgcuucacaL   | G13   | u●G●ugaAgCGaaguGcAcac●u●u             |
| ALN-HBV02 | HBV         | P3        | g●u●guGcACUucgcuucacaL   | G14   | u●G●uga <u>A</u> gCGaaguGcAcac●u●u    |
| D13       | HBV         | P3        | g●u●guGcACUucgcuucacaL   | G14   | u●G●uga <u>G</u> CGaaguGcAcac●u●u     |
| D14       | <i>Ttr</i>  | P1        | a●a●caguGuUCUugcucuauaaL | G15   | u●U●au(A)GagcaagaAcAcuguu●u●u         |
| D15       | <i>Ttr</i>  | P1        | a●a●caguGuUCUugcucuauaaL | G16   | u●U●aua(G)agcaagaAcAcuguu●u●u         |
| D16       | <i>Ttr</i>  | P1        | a●a●caguGuUCUugcucuauaaL | G17   | u●U●auaG(A)gcaagaAcAcuguu●u●u         |
| D17       | <i>Ttr</i>  | P1        | a●a●caguGuUCUugcucuauaaL | G18   | u●U●auaGa(G)caagaAcAcuguu●u●u         |
| D18       | <i>Hao1</i> | P2        | g●a●auguGaaAGucaucgacaaL | G19   | u●U●gu(C)GaUGacuuUcAcauuc●u●g         |
| D19       | <i>Hao1</i> | P2        | g●a●auguGaaAGucaucgacaaL | G20   | u●U●guc(G)aUGacuuUcAcauuc●u●g         |
| D20       | <i>Hao1</i> | P2        | g●a●auguGaaAGucaucgacaaL | G21   | u●U●gucG(A)UGacuuUcAcauuc●u●g         |
| D21       | <i>Hao1</i> | P2        | g●a●auguGaaAGucaucgacaaL | G22   | u●U●gucGa(U)GacuuUcAcauuc●u●g         |

Italicized uppercase, lowercase, uppercase bold underlined, lowercase bold underlined, and uppercase letters in parentheses represent 2'-F, 2'-OME, (S)-GNA, 2'-deoxy, and 2'-5'-linked ribose sugar modifications, respectively, to Adenosine, Cytosine, Guanosine, Uridine, and Thymidine. "L" represents the tri-N-acetylgalactosamine ligand. Phosphorothioate linkages are indicated by the "●" symbol.

**Dose response of selected siRNAs in rats**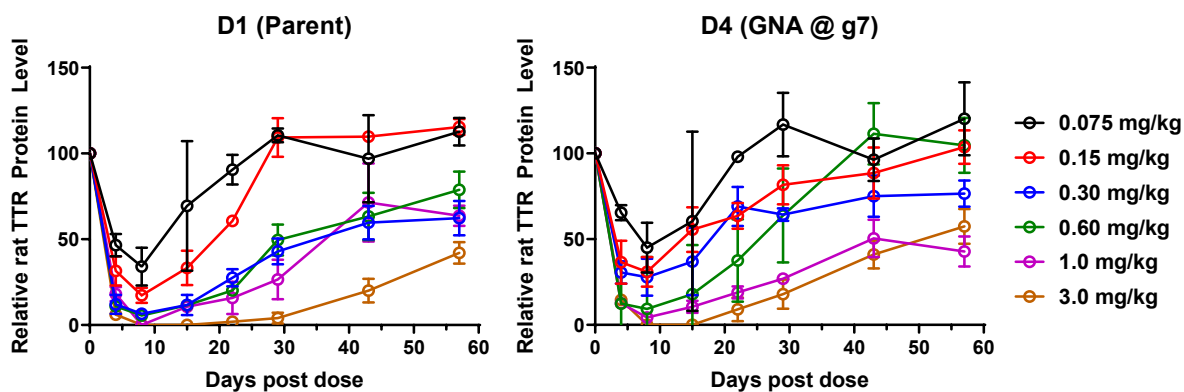

**Figure S1.** Knockdown of serum TTR protein in rats (n=3) with parent and GNA-modified siRNAs across the specified doses.

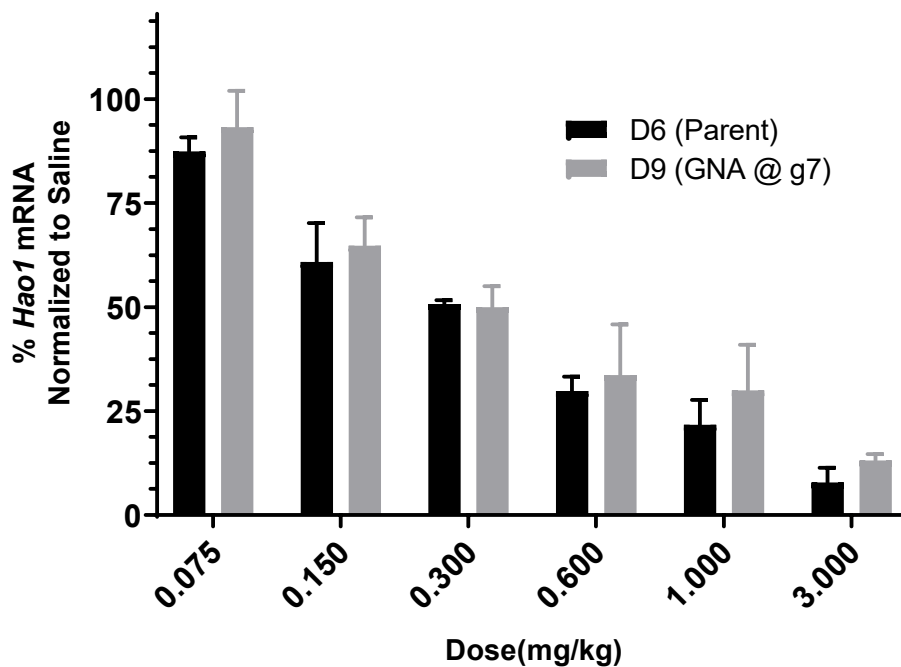

**Figure S2.** Knockdown of liver *Hao1* mRNA in rats (n=3) with parent and GNA-modified siRNAs across the specified doses.

**Metabolism identification and test article quantification in mouse liver****Table S2.** Identification of Guide Strand Metabolites from Selected siRNAs in Mouse Liver (n=1)

| siRNA | Observed MW | Identified Fragment (5' to 3')       | Nucleotides in Fragment (5' to 3') | % of Total Strand |
|-------|-------------|--------------------------------------|------------------------------------|-------------------|
| D1    | 7652.163    | u•U•auaGagcaagaAcAcuguu•u•u          | 1-23                               | 55                |
|       | 7316.153    | u•U•auaGagcaagaAcAcuguu•u            | 1-22 <sup>a</sup>                  | 45                |
| D4    | 7580.144    | u•U•auaG <u>A</u> gcaagaAcAcuguu•u•u | 1-23                               | 47                |
|       | 7244.128    | u•U•auaG <u>A</u> gcaagaAcAcuguu•u   | 1-22 <sup>a</sup>                  | 41                |
|       | 5566.906    | <u>A</u> gcaagaAcAcuguu•u•u          | 7-23                               | 6                 |
|       | 5230.896    | <u>A</u> gcaagaAcAcuguu•u            | 7-22                               | 6                 |
| D11   | 7588.166    | u•U•a <u>t</u> agagcaagaAcAcuguu•u•u | 1-23                               | 57                |
|       | 7252.151    | u•U•a <u>t</u> agagcaagaAcAcuguu•u   | 1-22                               | 43                |
| D6    | 7534.054    | u•U•gucGaUGacuuUcAcauuc•u•g          | 1-23                               | 47                |
|       | 7159.012    | u•U•gucGaUGacuuUcAcauuc•u            | 1-22                               | 53                |
|       | 7462.034    | u•U•gucG <u>A</u> UGacuuUcAcauuc•u•g | 1-23                               | 35                |
| D9    | 7086.991    | u•U•gucG <u>A</u> UGacuuUcAcauuc•u   | 1-22                               | 57                |
|       | 5456.814    | <u>A</u> UGacuuUcAcauuc•u•g          | 7-23                               | 4                 |
|       | 5081.774    | <u>A</u> UGacuuUcAcauuc•u            | 7-22                               | 4                 |
| D12   | 7508.112    | u•U•g <u>t</u> cgatGacuuUcAcauuc•u•g | 1-23                               | 45                |
|       | 7133.069    | u•U•g <u>t</u> cgatGacuuUcAcauuc•u   | 1-22                               | 55                |

Italicized uppercase, lowercase, uppercase bold underlined, and lowercase bold underlined represent 2'-F, 2'-OMe, (S)-GNA, and 2'-deoxy modifications, respectively, to Adenosine, Cytosine, Guanosine, Uridine, and Thymidine. Phosphorothioate linkages are indicated by the “•” symbol. Percent of strand is calculated based on TIC intensity summed for all metabolites of a given strand. <sup>a</sup> Metabolite is isobaric with the 2-23 fragment, but the proposed 3'-metabolite is more likely.

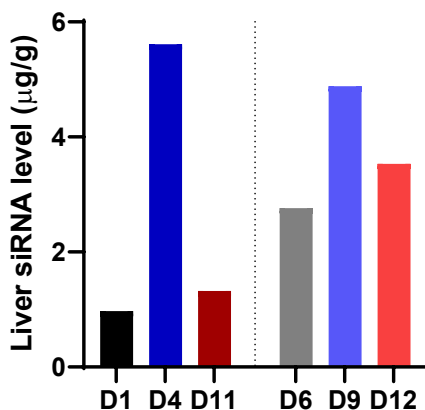

**Figure S3.** Level of guide strand detected in liver via RT-qPCR from various GalNAc-siRNAs seven days post a single dose of 10 mg/kg in mice (n=1).

**In vitro off-target silencing of DNA-modified siRNAs**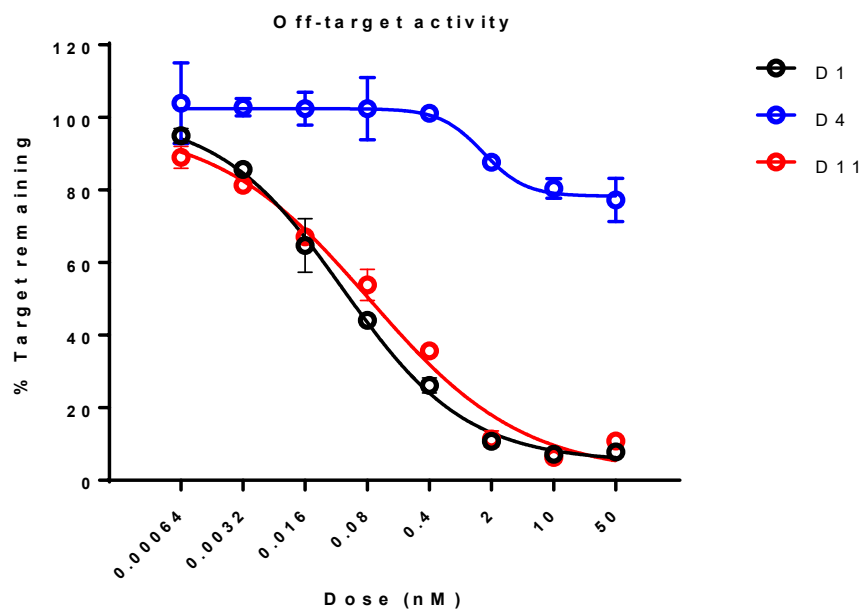

**Figure S4.** Activity of siRNAs targeting *Ttr* in the off-target reporter assay (n=4).

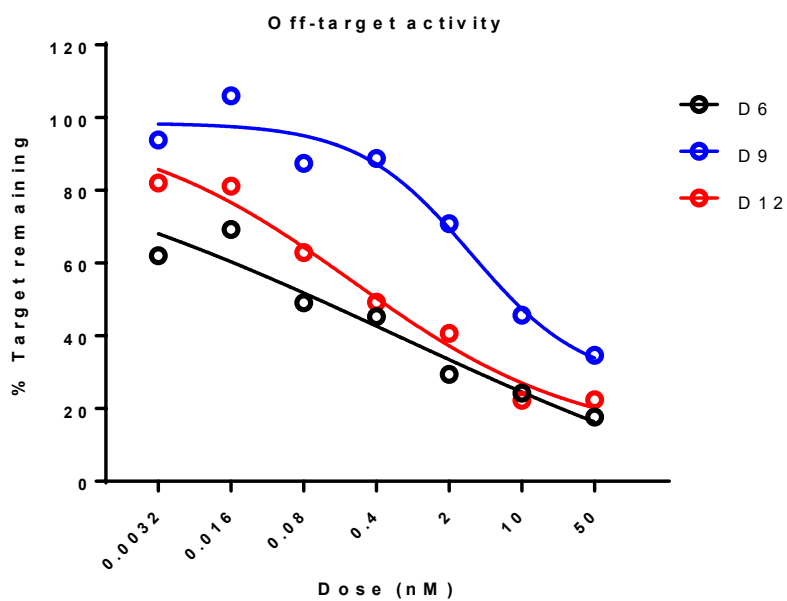

**Figure S5.** Activity of siRNAs targeting *Hao1* in the off-target reporter assay (n=4).

**Additional single-dose knockdown data in mice**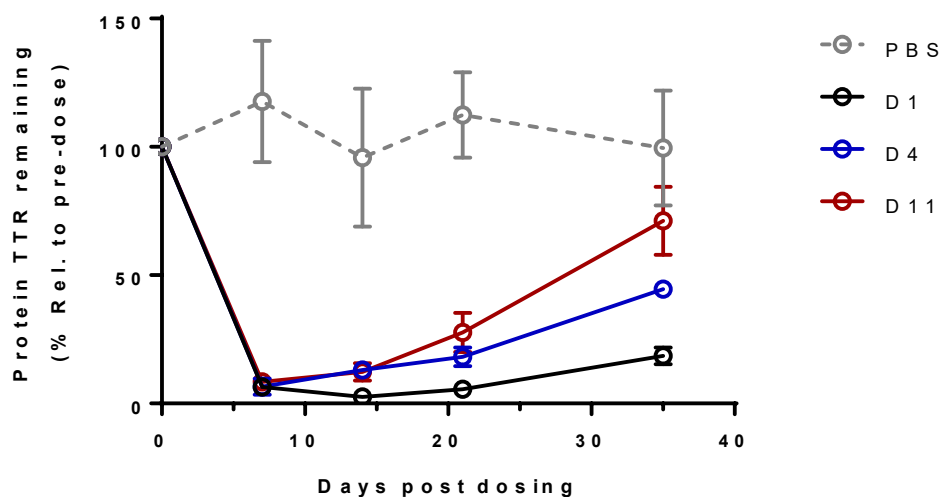

**Figure S6.** Knockdown of serum TTR protein in mice (n=3) with parent and modified siRNAs administered subcutaneously at 1 mg/kg.

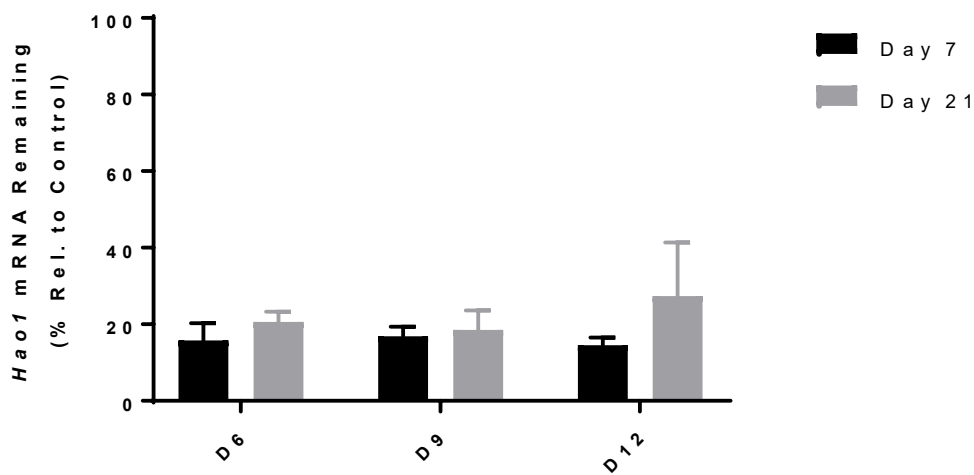

**Figure S7.** Knockdown of liver *Hao1* mRNA in mice (n=3) with parent and modified siRNAs administered subcutaneously at 1 mg/kg.

### Clinical pathology graphs and tables

Results were generated for animals in four different rat toxicology studies (siRNAs dosed 3x weekly at specified dose):

1. **D1, D4, D6, and D9 @ 3, 10, and 30 mg/kg; 0.9% NaCl (#1) (n=4)**
2. **D1 and D4 @ 30, 60, and 120 mg/kg; 0.9% NaCl (#2) (n=4-5)**
3. **D1, D4, and D11 @ 30 mg/kg; 0.9% NaCl (n=4)**
4. **D6, D9, and D12 @ 30 mg/kg; D6 and D9 @ 60 and 120 mg/kg; 0.9% NaCl (#2) (n=4);** Note that no animals from the 120 mg/kg cohort for **D6** successfully completed the study and the data is representative from those animals found moribund or sacrificed early.

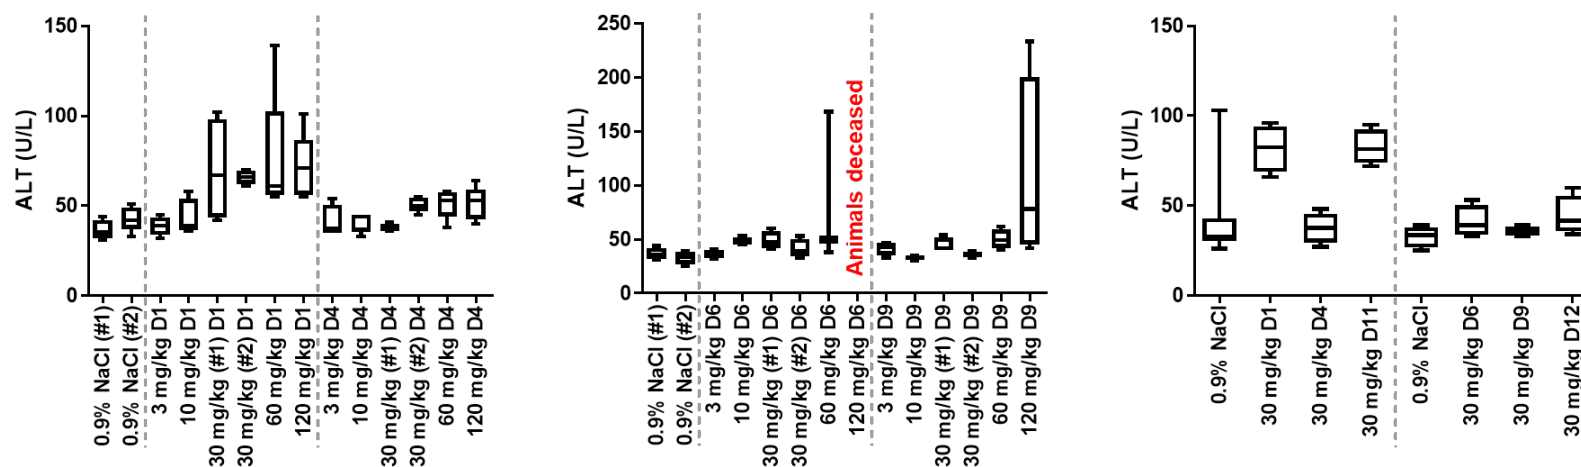

**Figure S8.** Alanine transaminase (ALT) levels in rats of *Ttr*- or *Haol*-targeting siRNAs **D1, D4, D11, D6, D9, and D12** dosed 3x weekly at 3, 10, 30, 60, or 120 mg/kg (n=4-5). Levels for **D6** at 120 mg/kg were not able to be determined from animals that died prematurely.

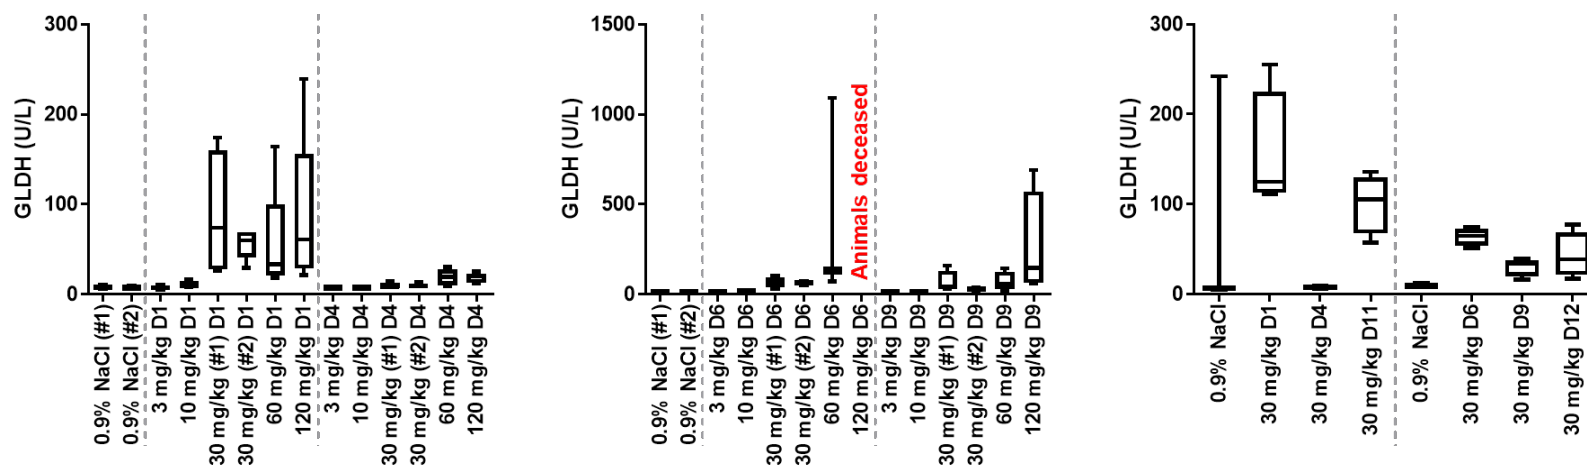

**Figure S9.** Glutamate dehydrogenase (GLDH) levels in rats of *Ttr*- or *Hao1*-targeting siRNAs **D1**, **D4**, **D11**, **D6**, **D9**, and **D12** dosed 3x weekly at 3, 10, 30, 60, or 120 mg/kg (n=4-5). Data for **D6** at 120 mg/kg was not collected from animals that died prematurely.

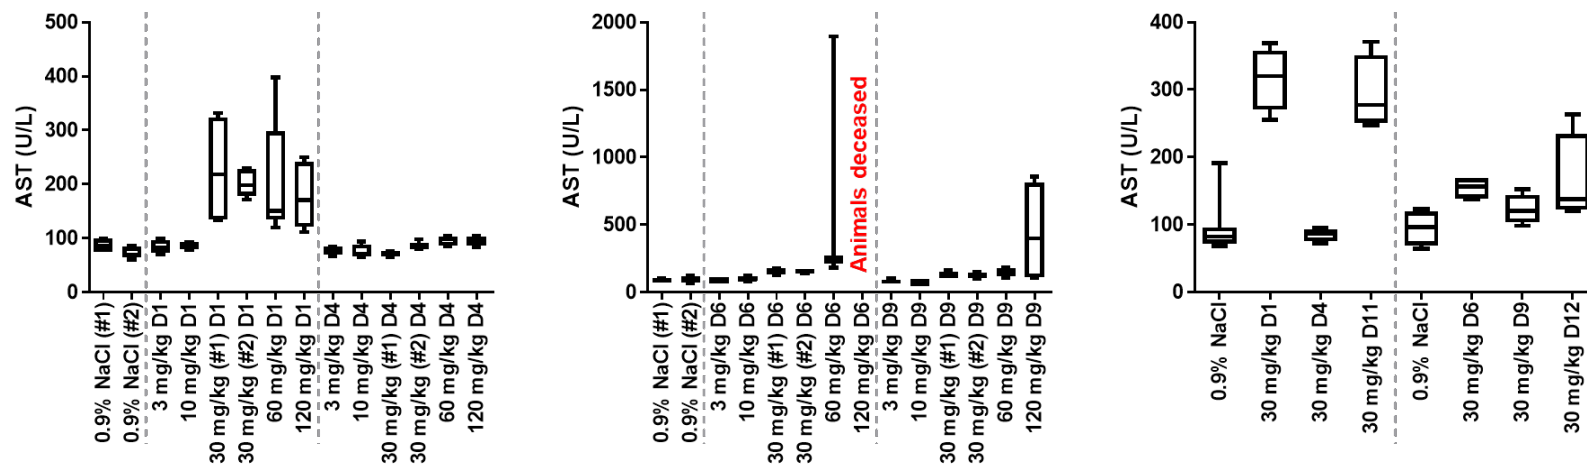

**Figure S10.** Aspartate aminotransferase (AST) levels in rats of *Ttr*- or *Hao1*-targeting siRNAs **D1**, **D4**, **D11**, **D6**, **D9**, and **D12** dosed 3x weekly at 3, 10, 30, 60, or 120 mg/kg (n=4-5). Data for **D6** at 120 mg/kg was not collected from animals that died prematurely.



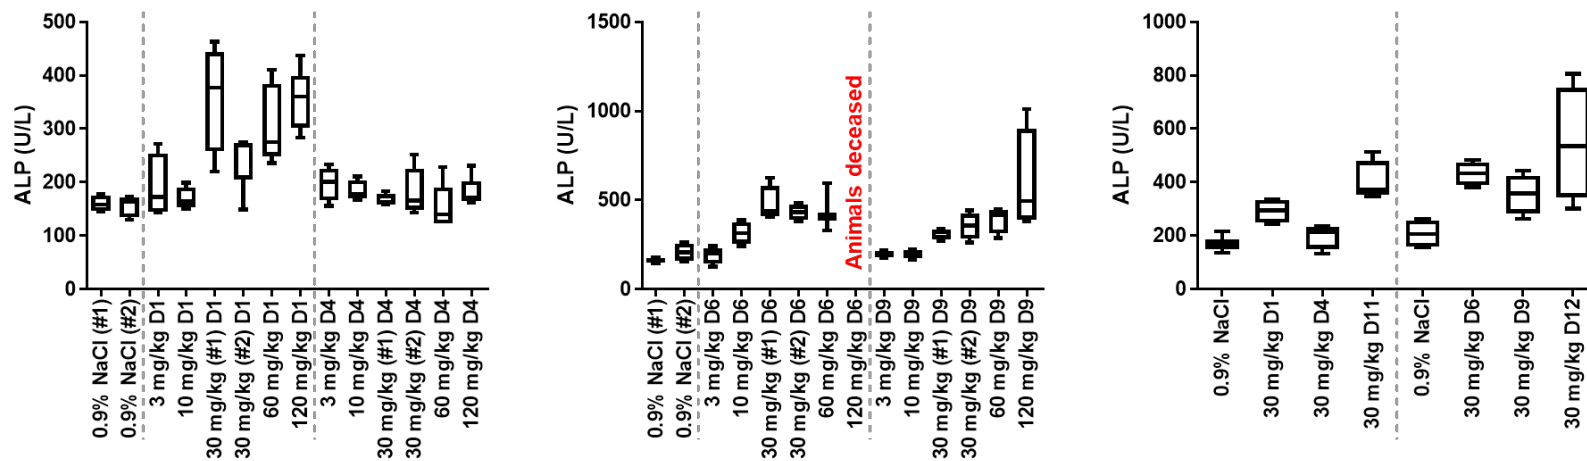

**Figure S11.** Alkaline phosphatase (ALP) levels in rats of *Ttr*- or *HaoI*-targeting siRNAs **D1**, **D4**, **D11**, **D6**, **D9**, and **D12** dosed 3x weekly at 3, 10, 30, 60, or 120 mg/kg (n=4-5). Data for **D6** at 120 mg/kg was not collected from animals that died prematurely.

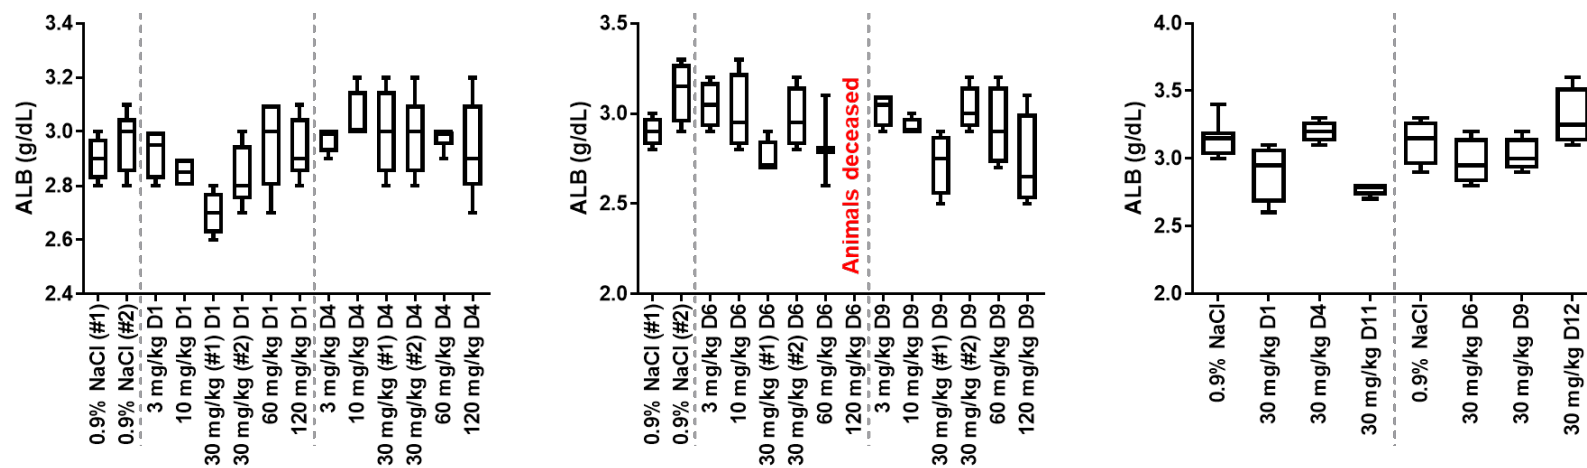

**Figure S12.** Albumin (ALB) levels in rats of *Ttr*- or *HaoI*-targeting siRNAs **D1**, **D4**, **D11**, **D6**, **D9**, and **D12** dosed 3x weekly at 3, 10, 30, 60, or 120 mg/kg (n=4-5). Data for **D6** at 120 mg/kg was not collected from animals that died prematurely.

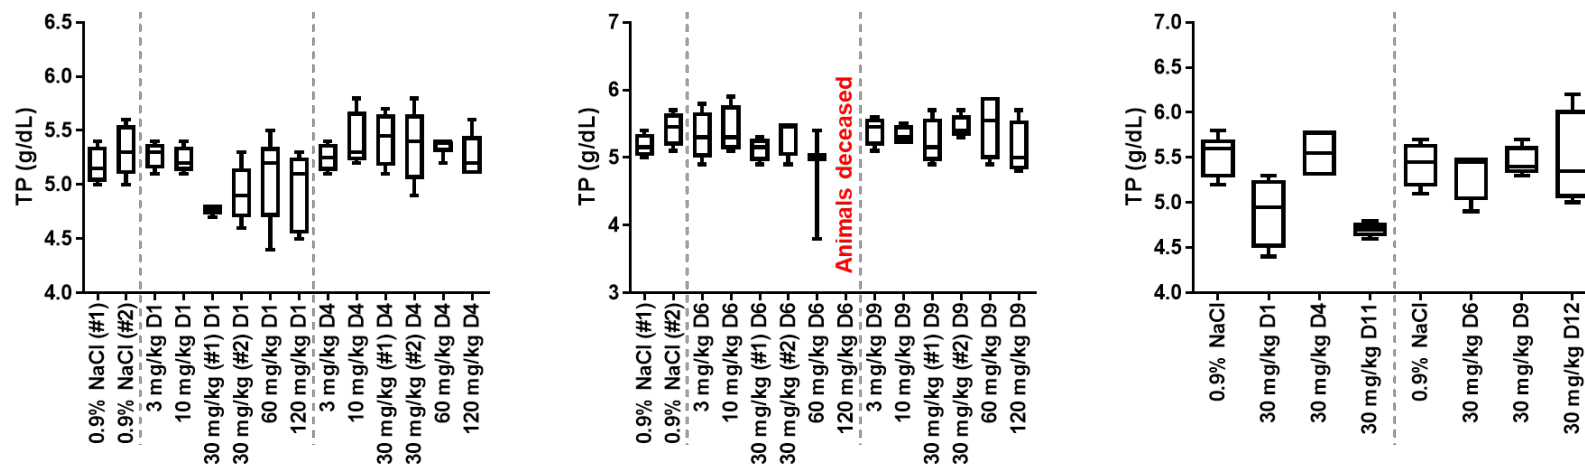

**Figure S13.** Total protein (TP) levels in rats of *Ttr*- or *Haol*-targeting siRNAs **D1**, **D4**, **D11**, **D6**, **D9**, and **D12** dosed 3x weekly at 3, 10, 30, 60, or 120 mg/kg (n=4-5). Data for **D6** at 120 mg/kg was not collected from animals that died prematurely.

**Table S3.** Tabulated clinical pathology data for *Ttr*-targeting siRNAs (n=4-5).

| Parameter | D1        |           |           |           |           |           |           |           | D4        |           |           |           |           |           |
|-----------|-----------|-----------|-----------|-----------|-----------|-----------|-----------|-----------|-----------|-----------|-----------|-----------|-----------|-----------|
|           | 0.9% NaCl | 0.9% NaCl | 3 mg/kg   | 10 mg/kg  | 30 mg/kg  | 30 mg/kg  | 60 mg/kg  | 120 mg/kg | 3 mg/kg   | 10 mg/kg  | 30 mg/kg  | 30 mg/kg  | 60 mg/kg  | 120 mg/kg |
| ALT       | 37 ± 5    | 43 ± 7    | 39 ± 5    | 43 ± 10   | 70 ± 29   | 66 ± 4    | 76 ± 36   | 71 ± 18   | 41 ± 9    | 42 ± 6    | 38 ± 2    | 51 ± 4    | 51 ± 8    | 51 ± 9    |
| GLDH      | 8 ± 2     | 7 ± 1     | 7 ± 2     | 11 ± 4    | 87 ± 71   | 56 ± 17   | 55 ± 61   | 86 ± 88   | 7 ± 1     | 8 ± 1     | 9 ± 3     | 9 ± 2     | 19 ± 9    | 18 ± 6    |
| AST       | 87 ± 14   | 76 ± 11   | 84 ± 13   | 87 ± 7    | 225 ± 105 | 202 ± 25  | 203 ± 112 | 179 ± 61  | 79 ± 8    | 75 ± 13   | 72 ± 5    | 86 ± 7    | 94 ± 9    | 94 ± 9    |
| ALP       | 160 ± 15  | 155 ± 19  | 190 ± 60  | 170 ± 21  | 359 ± 101 | 245 ± 54  | 308 ± 73  | 353 ± 57  | 198 ± 32  | 184 ± 19  | 166 ± 11  | 183 ± 44  | 153 ± 44  | 181 ± 28  |
| ALB       | 2.9 ± 0.1 | 3.0 ± 0.1 | 2.9 ± 0.1 | 2.9 ± 0.1 | 2.7 ± 0.1 | 2.8 ± 0.1 | 3.0 ± 0.2 | 2.9 ± 0.1 | 3.0 ± 0.1 | 3.1 ± 0.1 | 3.0 ± 0.2 | 3.0 ± 0.1 | 3.0 ± 0   | 2.9 ± 0.2 |
| TP        | 5.2 ± 0.2 | 5.3 ± 0.2 | 5.3 ± 0.1 | 5.2 ± 0.1 | 4.8 ± 0   | 4.9 ± 0.3 | 5.1 ± 0.4 | 4.9 ± 0.4 | 5.3 ± 0.1 | 5.4 ± 0.3 | 5.4 ± 0.3 | 5.4 ± 0.3 | 5.4 ± 0.1 | 5.3 ± 0.2 |

Values represent the mean +/- standard deviation for all animals in the study

**Table S4.** Tabulated clinical pathology data for selected siRNAs at 30 mg/kg (n=4).

|           |      | <i>Ttr</i> |           |           | <i>Hao1</i> |           |           |           |           |
|-----------|------|------------|-----------|-----------|-------------|-----------|-----------|-----------|-----------|
|           |      | 0.9% NaCl  | D1        | D4        | D11         | 0.9% NaCl | D6        | D9        | D12       |
| Parameter | ALT  | 42 ± 25    | 82 ± 13   | 38 ± 9    | 83 ± 10     | 33 ± 6    | 41 ± 9    | 36 ± 3    | 44 ± 11   |
|           | GLDH | 36 ± 83    | 154 ± 68  | 8 ± 1     | 101 ± 33    | 9 ± 2     | 64 ± 10   | 31 ± 10   | 43 ± 25   |
|           | AST  | 96 ± 40    | 316 ± 47  | 85 ± 10   | 293 ± 55    | 95 ± 26   | 155 ± 17  | 123 ± 22  | 165 ± 67  |
|           | ALP  | 170 ± 25   | 292 ± 44  | 199 ± 46  | 401 ± 76    | 207 ± 53  | 432 ± 43  | 355 ± 74  | 544 ± 213 |
|           | ALB  | 3.2 ± 0.1  | 2.9 ± 0.2 | 3.2 ± 0.1 | 2.8 ± 0     | 3.1 ± 0.2 | 3.0 ± 0.2 | 3.0 ± 0.1 | 3.3 ± 0.2 |
|           | TP   | 5.5 ± 0.2  | 4.9 ± 0.4 | 5.6 ± 0.3 | 4.7 ± 0.1   | 5.4 ± 0.3 | 5.3 ± 0.3 | 5.5 ± 0.2 | 5.5 ± 0.5 |

Values represent the mean +/- standard deviation for all animals in the study

**Table S5.** Tabulated clinical pathology data for *Hao1*-targeting siRNAs (n=4).

|           |      | D6        |           |           |           |           |           |           | D9        |           |           |           |           |           |           |
|-----------|------|-----------|-----------|-----------|-----------|-----------|-----------|-----------|-----------|-----------|-----------|-----------|-----------|-----------|-----------|
|           |      | 0.9% NaCl | 0.9% NaCl | 3 mg/kg   | 10 mg/kg  | 30 mg/kg  | 30 mg/kg  | 60 mg/kg  | 120 mg/kg | 3 mg/kg   | 10 mg/kg  | 30 mg/kg  | 30 mg/kg  | 60 mg/kg  | 120 mg/kg |
| Parameter | ALT  | 37 ± 5    | 33 ± 6    | 37 ± 4    | 49 ± 4    | 49 ± 8    | 41 ± 9    | 85 ± 72   | n.d.      | 42 ± 6    | 33 ± 2    | 45 ± 7    | 36 ± 3    | 50 ± 9    | 108 ± 87  |
|           | GLDH | 8 ± 2     | 9 ± 2     | 6 ± 1     | 19 ± 9    | 64 ± 30   | 64 ± 10   | 430 ± 572 | n.d.      | 7 ± 1     | 7 ± 1     | 66 ± 62   | 31 ± 10   | 71 ± 53   | 260 ± 295 |
|           | AST  | 87 ± 14   | 95 ± 26   | 86 ± 9    | 100 ± 20  | 155 ± 24  | 155 ± 17  | 772 ± 974 | n.d.      | 83 ± 16   | 70 ± 4    | 131 ± 22  | 123 ± 22  | 153 ± 34  | 441 ± 383 |
|           | ALP  | 160 ± 15  | 207 ± 53  | 192 ± 49  | 315 ± 62  | 477 ± 100 | 432 ± 43  | 445 ± 136 | n.d.      | 195 ± 19  | 196 ± 23  | 312 ± 29  | 355 ± 74  | 392 ± 75  | 595 ± 288 |
|           | ALB  | 2.9 ± 0.1 | 3.1 ± 0.2 | 3.1 ± 0.1 | 3.0 ± 0.2 | 2.8 ± 0.1 | 3.0 ± 0.2 | 2.8 ± 0.3 | n.d.      | 3.0 ± 0.1 | 2.9 ± 0.1 | 2.7 ± 0.2 | 3.0 ± 0.1 | 2.9 ± 0.2 | 2.7 ± 0.3 |
|           | TP   | 5.2 ± 0.2 | 5.4 ± 0.3 | 5.3 ± 0.4 | 5.4 ± 0.4 | 5.1 ± 0.2 | 5.3 ± 0.3 | 4.7 ± 0.8 | n.d.      | 5.4 ± 0.2 | 5.3 ± 0.2 | 5.2 ± 0.3 | 5.5 ± 0.2 | 5.5 ± 0.5 | 5.1 ± 0.4 |

Values represent the mean +/- standard deviation for all animals in the study

**Microscopic liver findings in rats**

Results were generated for animals in four different rat toxicology studies (siRNAs dosed 3x weekly at specified dose):

1. **D1, D4, D6, and D9 @ 3, 10, and 30 mg/kg; 0.9% NaCl (#1) (n=4)**
2. **D1 and D4 @ 30, 60, and 120 mg/kg; 0.9% NaCl (#2) (n=5)**
3. **D1, D4, and D11 @ 30 mg/kg; 0.9% NaCl (n=4)**
4. **D6, D9, and D12 @ 30 mg/kg; D6 and D9 @ 60 and 120 mg/kg; 0.9% NaCl (#2) (n=4);**  
Note that no animals from the 120 mg/kg cohort for **D6** successfully completed the study and the data is representative from those animals found moribund or sacrificed early.

**Table S6.** Microscopic liver findings after treatment with *Ttr*-targeting siRNAs (n=4-5).

| Dose                           | 0.9%<br>NaCl | D1 |     |     |     |     |     | D4 |    |    |    |    |     |
|--------------------------------|--------------|----|-----|-----|-----|-----|-----|----|----|----|----|----|-----|
|                                |              | 3  | 10  | 30  | 30  | 60  | 120 | 3  | 10 | 30 | 30 | 60 | 120 |
| Degeneration                   |              |    | 1   | 2-3 | 2   | 1-3 | 1-3 |    |    |    |    |    |     |
| Increased mitoses              |              |    |     | 2-3 | 2-3 | 1-2 | 2-3 |    |    |    | 1  |    | 1   |
| Necrosis,<br>coagulative       |              |    |     | 1   |     |     | 1-2 |    |    |    |    |    |     |
| Necrosis, single<br>cell       |              |    | 1   | 1-2 | 1-2 | 1-2 | 1   |    |    | 1  | 1  | 1  | 1   |
| Vacuolation,<br>hepatocellular |              | 1  | 1-2 | 2   | 2   | 1-3 | 1-3 | 1  | 1  | 1  | 1  | 1  | 1   |
| Hyperplasia, oval<br>cell      |              |    |     |     |     |     | 2-3 |    |    |    |    |    |     |
| Karyomegaly                    |              |    |     |     |     | 1   | 1-2 |    |    |    |    |    |     |

The range of severity grade for each microscopic finding if present was graded on a scale of 1-4; (1 = minimal, 2 = mild, 3 = moderate, and 4 = marked).

**Table S7.** Microscopic liver findings after treatment with selected siRNAs at 30 mg/kg (n=4).

|                                       | 0.9%<br>NaCl | D1  | D4 | D11 | 0.9%<br>NaCl | D6   | D9   | D12  |
|---------------------------------------|--------------|-----|----|-----|--------------|------|------|------|
| Hyperplasia, bile duct                |              | 1   |    |     |              |      |      |      |
| Increases mitoses                     |              | 1-2 |    | 1-3 |              | 2    | 1    | 2-3  |
| Infiltration, mixed cell              |              |     |    | 1   | 1            | 2-3  | 1    | 2    |
| Karyomegaly                           |              |     |    | 1   | n.d.         | n.d. | n.d. | n.d. |
| Necrosis, single cell, hepatocellular |              | 1-2 |    | 1-2 |              | 1-3  | 1    | 2    |
| Vacuolation, hepatocellular           |              | 2-3 | 1  | 3-4 | 1            | 2-3  | 1-2  | 3-4  |

The range of severity grade for each microscopic finding if present was graded on a scale of 1-4; (1 = minimal, 2 = mild, 3 = moderate, and 4 = marked). n.d. = not determined

**Table S8.** Microscopic liver findings after treatment with *Haol*-targeting siRNAs (n=4).

| Dose                                    | 0.9%<br>NaCl | D6 |     |     |     |     |     | D9 |    |     |     |     |     |
|-----------------------------------------|--------------|----|-----|-----|-----|-----|-----|----|----|-----|-----|-----|-----|
|                                         |              | 3  | 10  | 30  | 30  | 60  | 120 | 3  | 10 | 30  | 30  | 60  | 120 |
| Change,<br>cytoplasmic,<br>eosinophilic |              |    |     |     |     | 1-2 | 2   |    |    |     |     |     | 2   |
| Hyperplasia, bile<br>duct               |              |    |     |     |     | 2-3 | 2-3 |    |    |     |     |     | 1-2 |
| Hyperplasia,<br>Kupffer cell            |              |    |     | 1-2 |     |     | 2-3 |    |    |     |     |     |     |
| Hyperplasia, oval<br>cell               |              |    |     |     |     | 1-4 | 1   |    |    |     |     |     | 1-2 |
| Hypertrophy,<br>hepatocellular          |              |    |     |     |     | 2-3 | 2   |    |    |     |     |     |     |
| Increased mitoses                       |              |    |     | 1   | 2   | 3   | 1-3 |    |    | 1   | 1   | 1   | 1-2 |
| Necrosis                                |              |    |     |     |     | 3-4 | 2-4 |    |    |     |     |     | 2-3 |
| Necrosis, single<br>cell                |              |    |     | 2-3 | 1-3 | 2-3 | 2   |    |    | 1   | 1   | 1-2 | 1-2 |
| Vacuolation,<br>hepatocellular          | 1            | 1  | 1-2 | 2-3 | 2-3 | 2-3 | 1-2 | 1  | 1  | 1-2 | 1-2 | 1-2 | 1-2 |

The range of severity grade for each microscopic finding if present was graded on a scale of 1-4; (1 = minimal, 2 = mild, 3 = moderate, and 4 = marked).

**Therapeutic index calculation**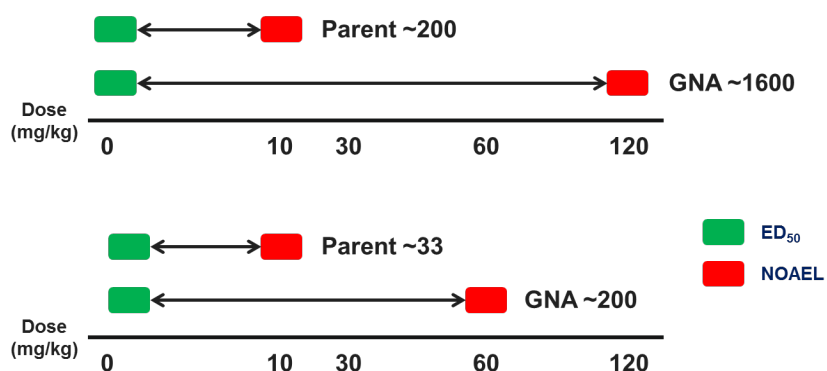

**Figure S14.** Therapeutic indices in rats as determined by ratio of ED<sub>50</sub> dose and NOAEL (n=4-5). The ED<sub>50</sub> values for *Ttr*-targeting siRNAs were 0.05 mg/kg (**D1**, parent) and 0.075 mg/kg (**D4**, GNA). The NOAEL values were 10 mg/kg (**D1**, parent) and >120 mg/kg (**D4**, GNA). The ED<sub>50</sub> values for *Hao1*-targeting siRNAs were 0.3 mg/kg for both parent **D6** and GNA **D9**. The NOAEL values were 10 mg/kg (**D6**, parent) and 60 mg/kg (**D9**, GNA).

**In vivo RNaseq MA plots, CDF plots, and DEG counts**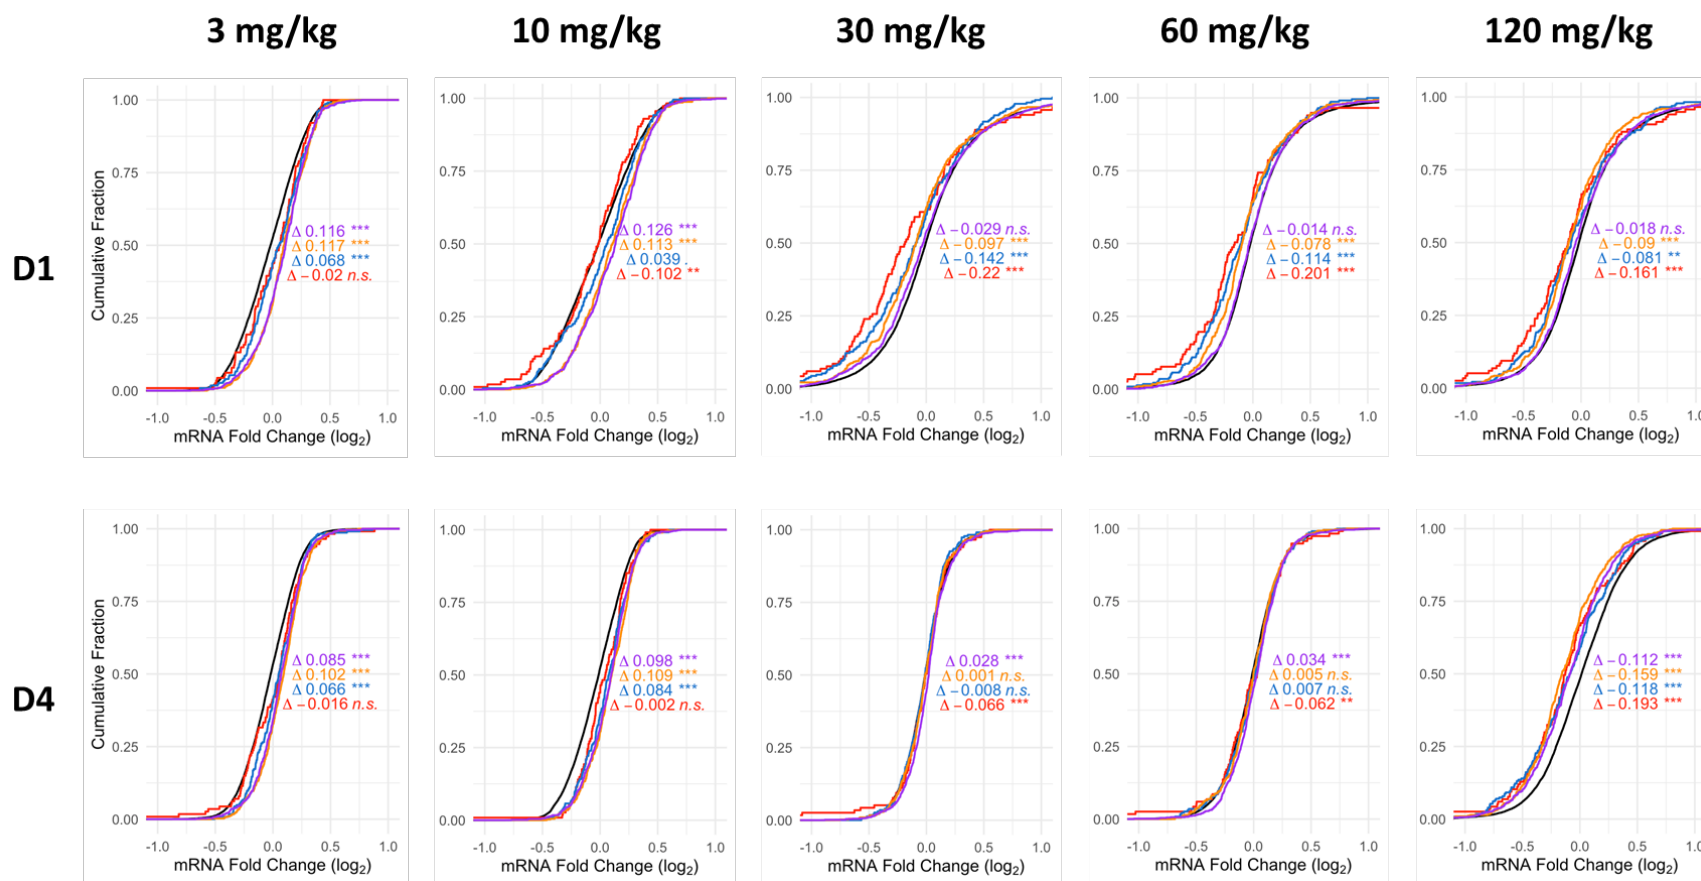

**Figure S15.** Cumulative distribution function (CDF) plots relative to control after treatment with the designated *Ttr*-targeting siRNAs **D1** and **D4** dosed 3x weekly at the specified dose (n=4-5). Each colored line represents the impact of different types of seed matches on the cumulative dysregulation of gene transcripts; black = background, purple = mer6, yellow = mer7-A1, blue = mer7-m8, red = mer8.

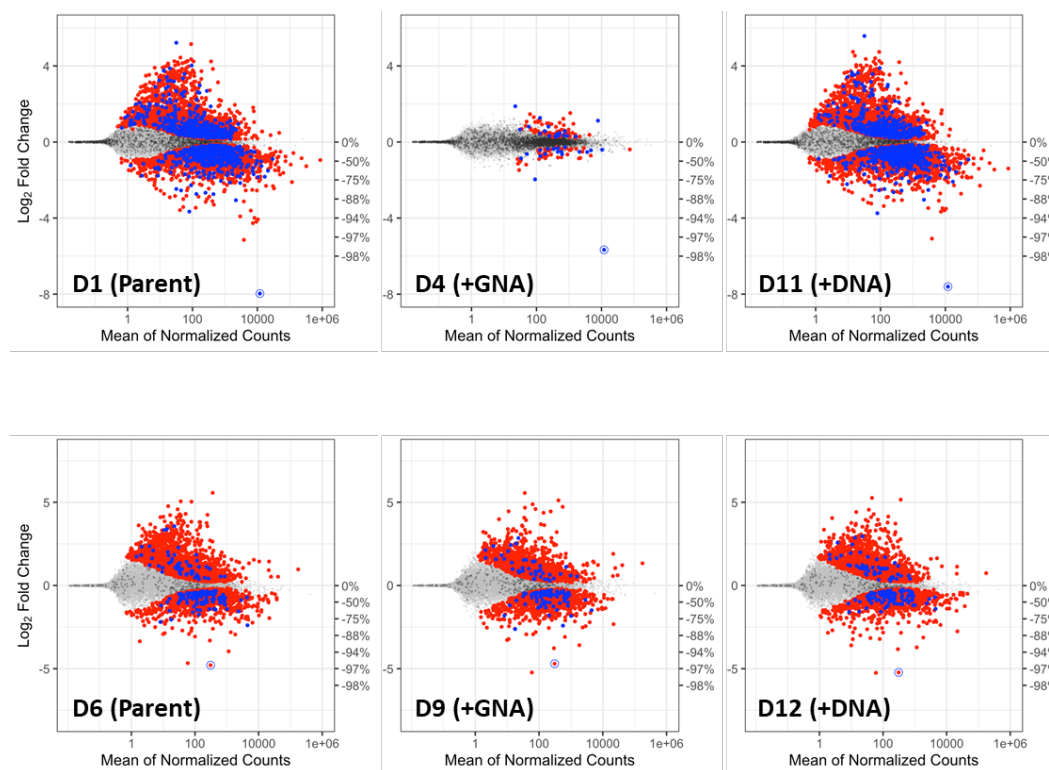

**Figure S16.** Gene dysregulation in rats following weekly dosing of GalNAc-siRNAs targeting *Ttr* (**D1**, **D4**, **D11**) or *Hao1* (**D6**, **D9**, **D12**). Rats were administered three weekly doses of 30 mg/kg, and frozen livers were collected 24 hours post last dose for RNAseq analysis (n=4). Each dot shown represents a gene transcript in the rat transcriptome, their average read count, and the level of change in expression compared to the control group dosed with 0.9% NaCl. Whereas grey dots represent gene transcripts which were not determined to be differentially expressed after siRNA treatment relative to the control, the blue and red dots represent differentially expressed transcripts (false discovery rate <0.05) with or without a canonical miRNA match (8mer, 7mer-A1, 7mer-m8) to the guide seed region, respectively. On-target knockdown is represented by the circled dot.



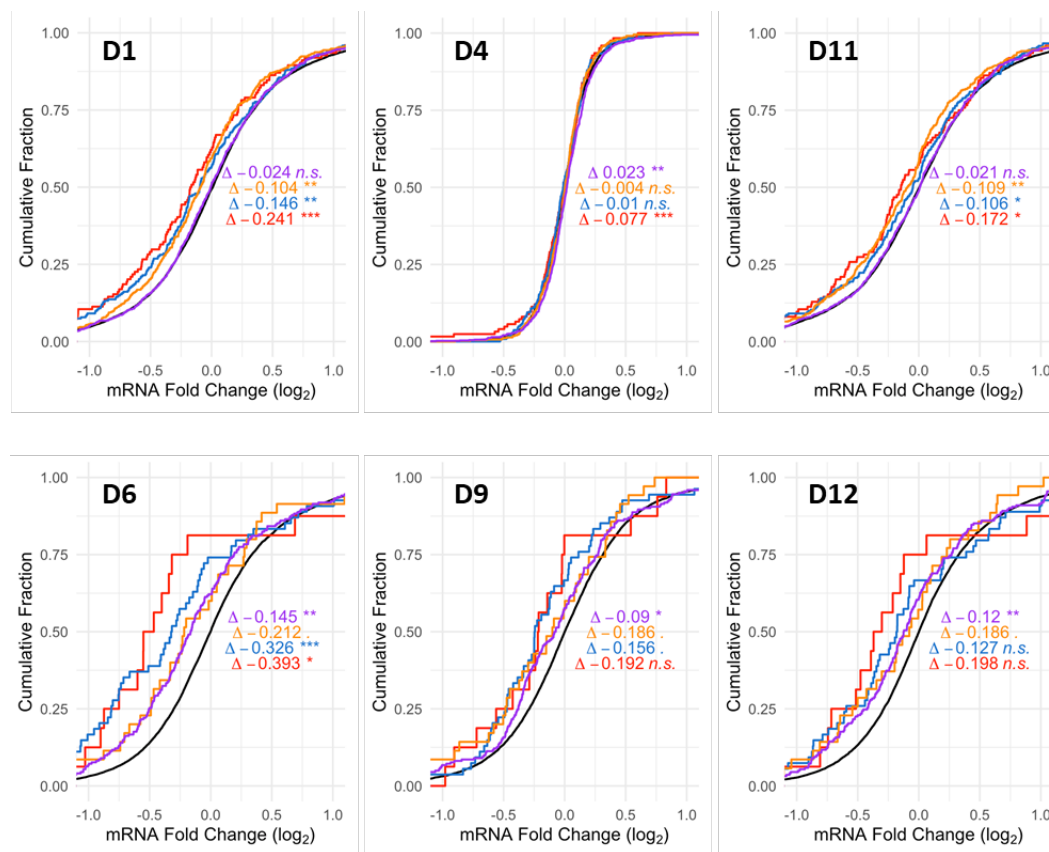

**Figure S17.** Cumulative distribution function (CDF) plots relative to control after treatment with the specified *Ttr*- and *Hao1*-targeting siRNAs dosed 3x weekly at 30 mg/kg (n=4). Each colored line represents the impact of different types of seed matches on the cumulative dysregulation of gene transcripts; black = background, purple = mer6, yellow = mer7-A1, blue = mer7-m8, red = mer8.

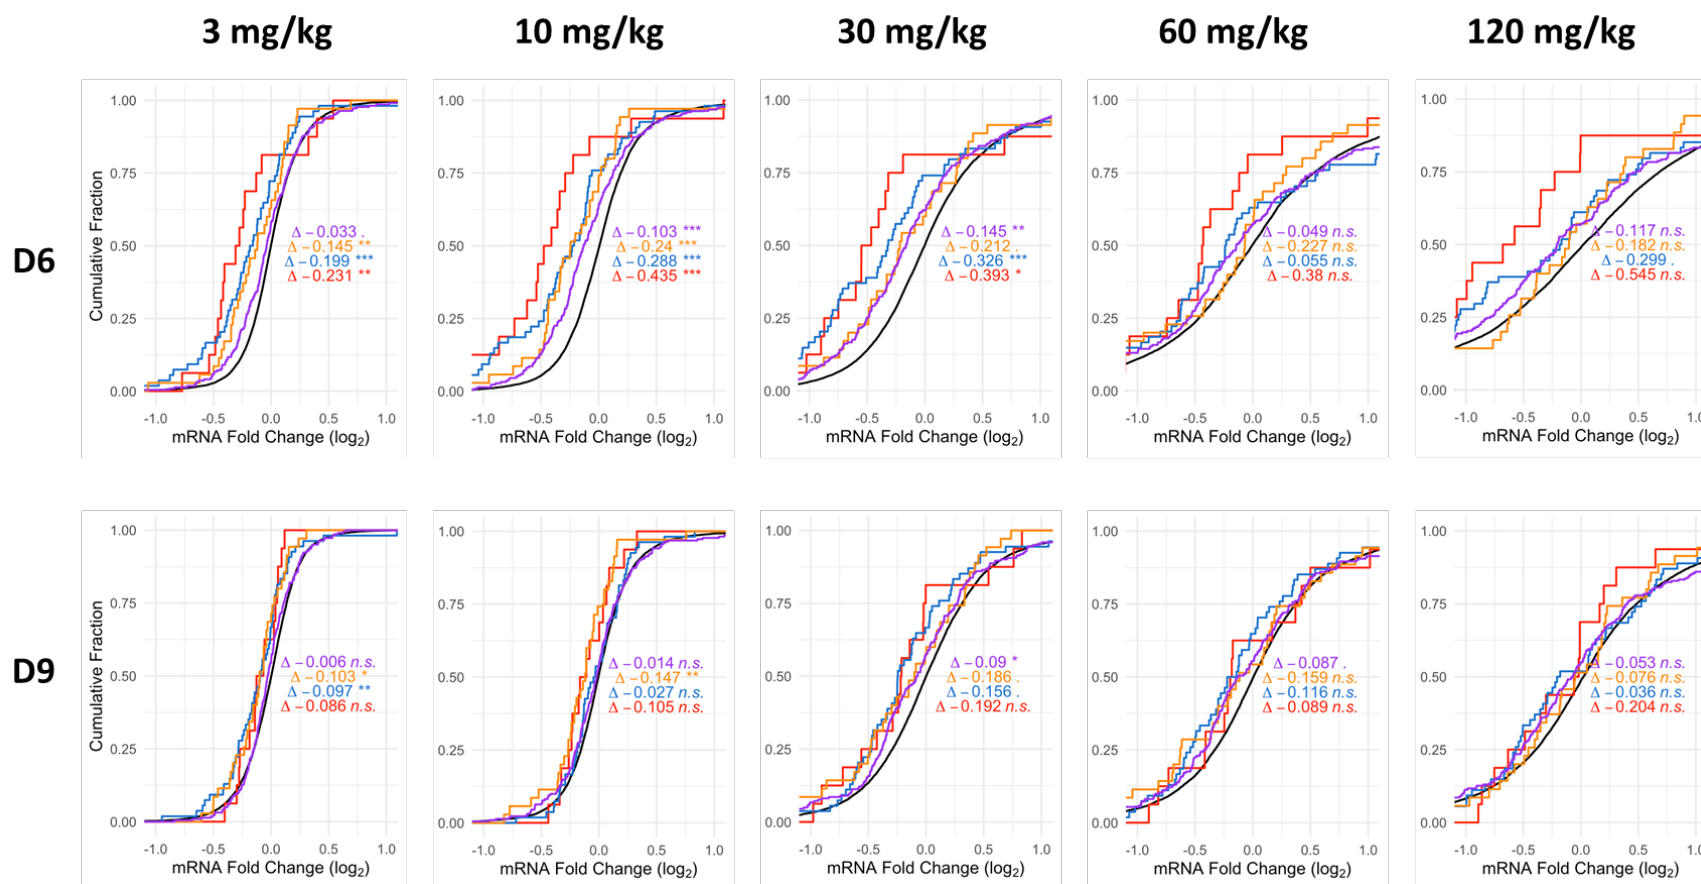

**Figure S18.** Cumulative distribution function (CDF) plots relative to control after treatment with the designated *Hao1*-targeting siRNAs **D6** and **D9** dosed 3x weekly at the specified dose (n=4). Each colored line represents the impact of different types of seed matches on the cumulative dysregulation of gene transcripts; black = background, purple = mer6, yellow = mer7-A1, blue = mer7-m8, red = mer8.

**Table S9.** Number of differentially expressed gene transcripts from *in vivo* RNAseq after treatment with the specified *Ttr*- or *Hao1*-targeting siRNAs dosed 3x weekly at the specified doses (n=4-5).

| siRNA     | Target      | Seed Match | #DEGs  |         |         |         |          |
|-----------|-------------|------------|--------|---------|---------|---------|----------|
|           |             |            | 3mg/kg | 10mg/kg | 30mg/kg | 60mg/kg | 120mg/kg |
| <b>D1</b> | <i>Ttr</i>  | Background | 28     | 1003    | 1681    | 664     | 1204     |
|           |             | mer8       | 0      | 16      | 39      | 21      | 24       |
|           |             | mer7-m8    | 1      | 38      | 62      | 32      | 49       |
|           |             | mer7-A1    | 1      | 50      | 103     | 37      | 63       |
|           |             | mer6       | 7      | 95      | 186     | 62      | 116      |
| <b>D4</b> | <i>Ttr</i>  | Background | 49     | 1       | 2       | 23      | 684      |
|           |             | mer8       | 2      | 0       | 0       | 2       | 11       |
|           |             | mer7-m8    | 1      | 0       | 0       | 4       | 31       |
|           |             | mer7-A1    | 5      | 0       | 0       | 2       | 46       |
|           |             | mer6       | 7      | 0       | 0       | 2       | 80       |
| <b>D6</b> | <i>Hao1</i> | Background | 70     | 791     | 3959    | 7436    | 8208     |
|           |             | mer8       | 1      | 5       | 10      | 12      | 14       |
|           |             | mer7-m8    | 5      | 16      | 29      | 41      | 41       |
|           |             | mer7-A1    | 0      | 7       | 18      | 23      | 24       |
|           |             | mer6       | 10     | 38      | 107     | 166     | 173      |
| <b>D9</b> | <i>Hao1</i> | Background | 3      | 294     | 3144    | 4521    | 6325     |
|           |             | mer8       | 0      | 0       | 6       | 8       | 8        |
|           |             | mer7-m8    | 0      | 0       | 21      | 26      | 34       |
|           |             | mer7-A1    | 0      | 1       | 15      | 22      | 18       |
|           |             | mer6       | 0      | 15      | 79      | 101     | 148      |

Number of DEGs estimated relative to saline controls 24 hours post last dose at a false discovery rate < 0.05.

**Table S10.** Magnitude of cumulative dysregulation of gene transcripts as measured in CDF plots after treatment with the specified *Ttr*- or *Hao1*-targeting siRNAs dosed 3x weekly at the specified doses (n=4-5).

| siRNA | Target      | Seed Match | CDF Shift |           |           |           |           |
|-------|-------------|------------|-----------|-----------|-----------|-----------|-----------|
|       |             |            | 3mg/kg    | 10mg/kg   | 30mg/kg   | 60mg/kg   | 120mg/kg  |
| D1    | <i>Ttr</i>  | mer8       | -0.020    | -0.102**  | -0.220*** | -0.201*** | -0.161*** |
|       |             | mer7-m8    | 0.068***  | 0.039     | -0.142*** | -0.114*** | -0.081**  |
|       |             | mer7-A1    | 0.117***  | 0.113***  | -0.097*** | -0.078*** | -0.090*** |
|       |             | mer6       | 0.116***  | 0.126***  | -0.029    | -0.014    | -0.018    |
| D4    | <i>Ttr</i>  | mer8       | -0.016    | -0.002    | -0.066*** | -0.062**  | -0.193*** |
|       |             | mer7-m8    | 0.066***  | 0.084***  | -0.008    | 0.007     | -0.118*** |
|       |             | mer7-A1    | 0.102***  | 0.109***  | 0.001     | 0.005     | -0.159*** |
|       |             | mer6       | 0.085***  | 0.098***  | 0.028***  | 0.034***  | -0.112*** |
| D6    | <i>Hao1</i> | mer8       | -0.231**  | -0.435*** | -0.393*   | -0.380    | -0.545    |
|       |             | mer7-m8    | -0.199*** | -0.288*** | -0.326*** | -0.055    | -0.299    |
|       |             | mer7-A1    | -0.145**  | -0.240*** | -0.212    | -0.227    | -0.182    |
|       |             | mer6       | -0.033    | -0.103*** | -0.145**  | -0.049    | -0.117    |
| D9    | <i>Hao1</i> | mer8       | -0.086    | -0.105    | -0.192    | -0.089    | -0.204    |
|       |             | mer7-m8    | -0.097**  | -0.027    | -0.156    | -0.116    | -0.036    |
|       |             | mer7-A1    | -0.103*   | -0.147**  | -0.186    | -0.159    | -0.076    |
|       |             | mer6       | -0.006    | -0.014    | -0.090*   | -0.087    | -0.053    |

Significance of each relative to background is indicated as follows \*p < 0.05, \*\*p < 0.01, \*\*\*p < 0.001, \*\*\*\*p < 0.0001.

**Pharmacodynamics of GalNAc-siRNAs containing 2'-5'-RNA linkages**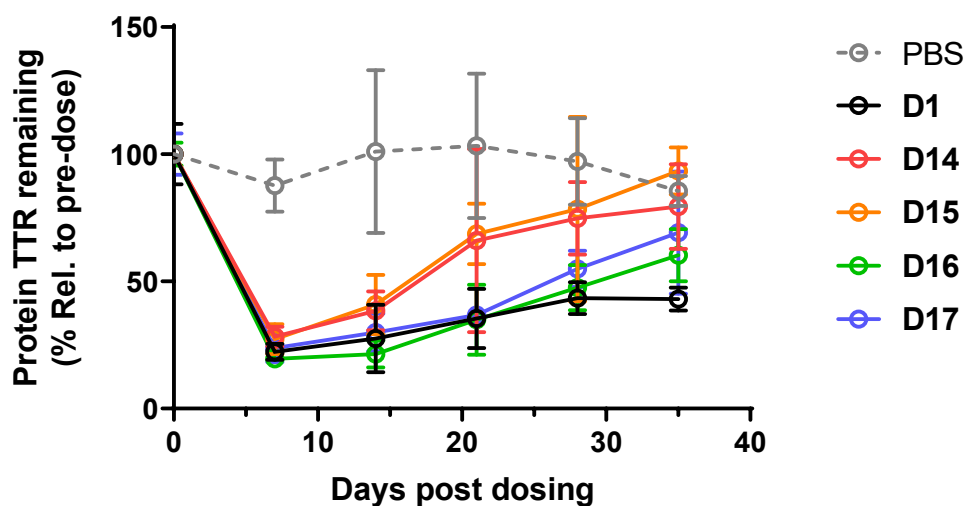

**Figure S19.** Knockdown of serum TTR protein after a single 0.5 mg/kg dose of parent or 2'-5'-RNA-modified siRNAs in mice (n=3).

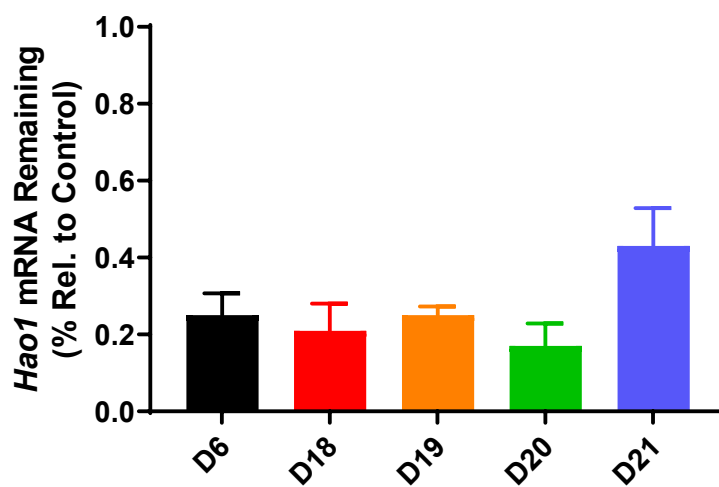

**Figure S20.** Knockdown of liver *Hao1* mRNA 7 days post a single 1 mg/kg dose of parent or 2'-5'-RNA-modified siRNAs in mice (n=3).

**In vitro off-target silencing of 2'-5'-RNA modified siRNAs**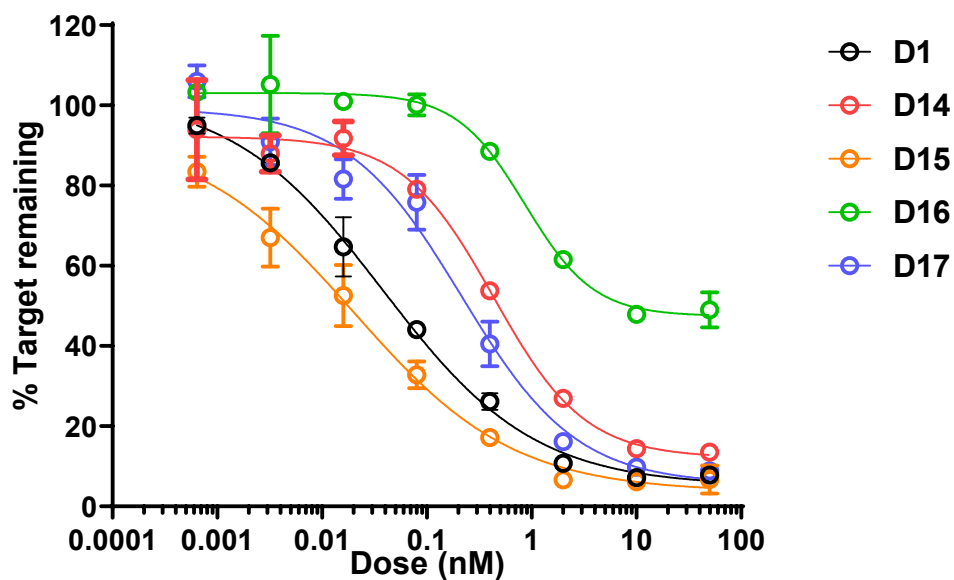

**Figure S21.** Activity of parent or 2'-5'-RNA-modified siRNAs targeting *Ttr* in the off-target reporter assay (n=4).

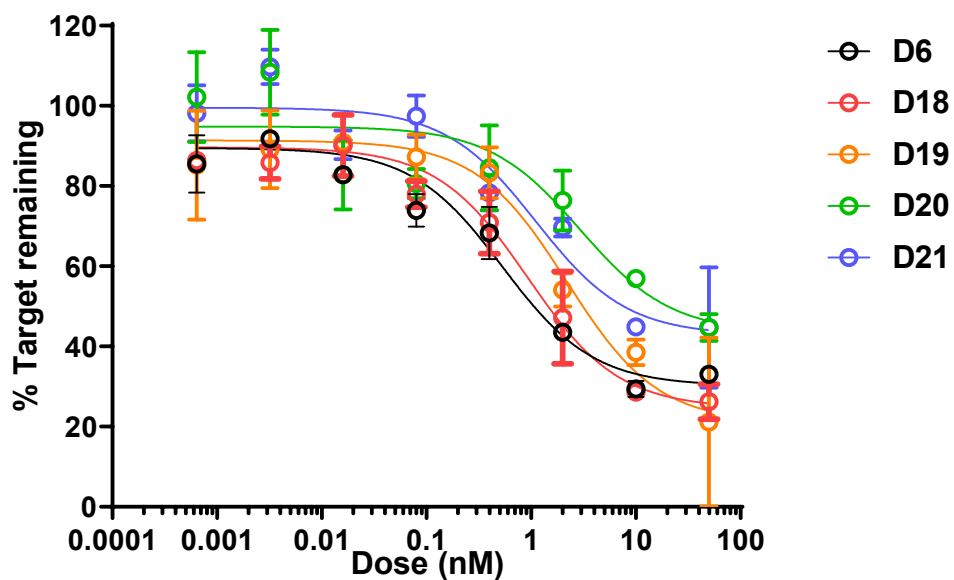

**Figure S22.** Activity of parent or 2'-5'-RNA-modified siRNAs targeting *Hao1* in the off-target reporter assay (n=4).

**In vitro CDF plots after treatment with 2'-5'-RNA modified siRNAs**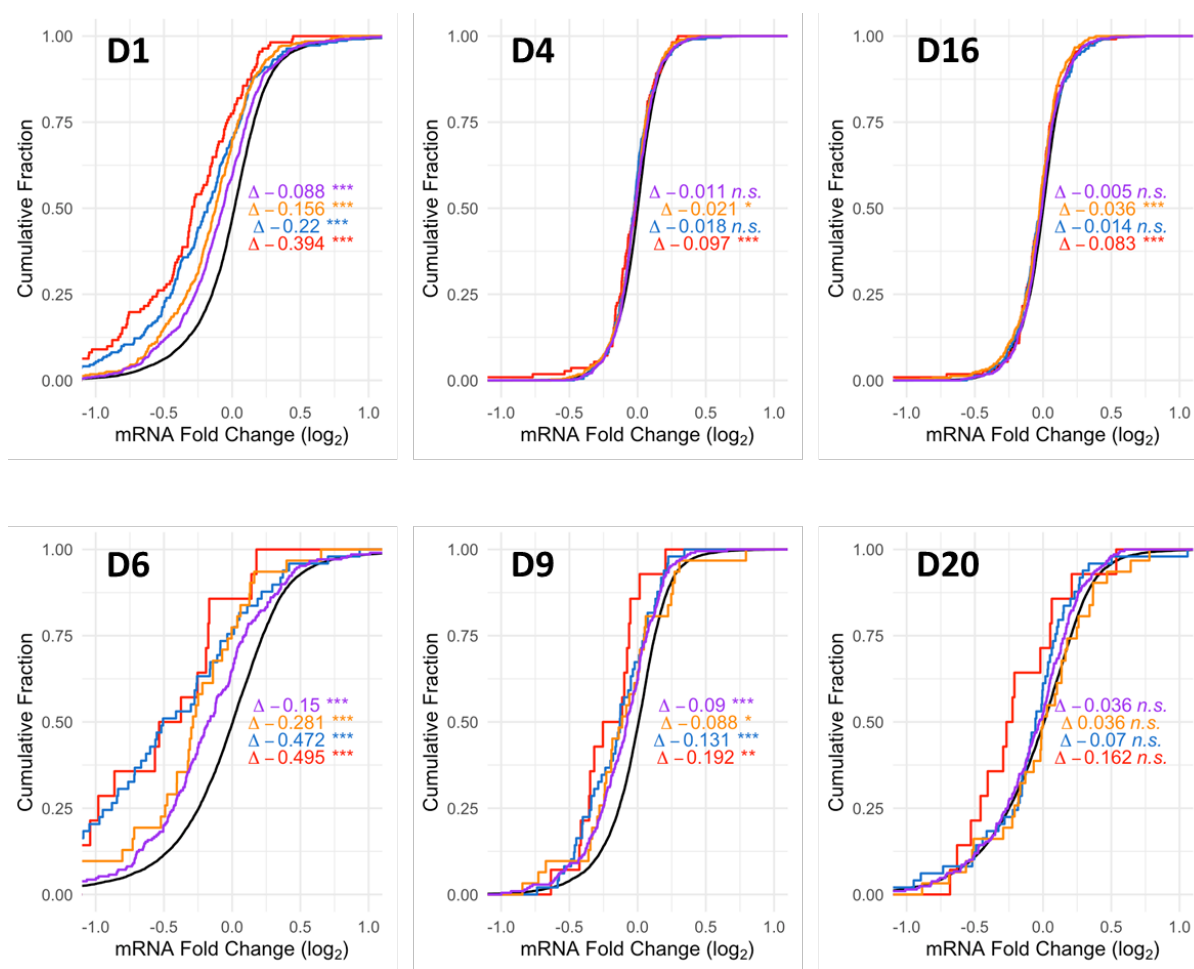

**Figure S23.** Cumulative distribution function (CDF) plots relative to control after transfection (n=4) with the designated *Ttr*- or *Hao1*-targeting siRNAs at a dose of 50 nM in primary rat hepatocytes. Each colored line represents the impact of different types of seed matches on the cumulative dysregulation of gene transcripts; black = background, purple = mer6, yellow = mer7-A1, blue = mer7-m8, red = mer8.

**Additional PD and RNAseq data with HBV-targeting GalNAc-siRNAs**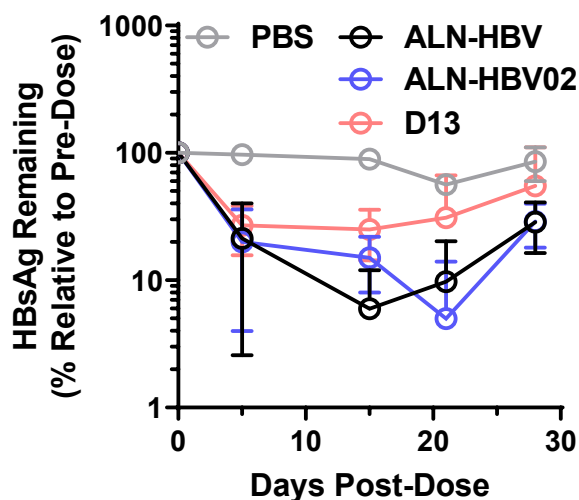

**Figure S24.** Evaluation of the pharmacodynamics after a single 1 mg/kg dose of HBV-targeting GalNAc-siRNAs in mice (n=3) transduced with HBV-AAV8. Serum HBsAg levels represent the average of all animals from a given cohort, each normalized to individual pre-dose serum HBsAg levels.

**Table S11.** Number of differentially expressed gene transcripts from *in vitro* RNAseq after treatment with ALN-HBV or ALN-HBV02 at 10nM (n=4)

| siRNA     | Seed Match | #DEGs |
|-----------|------------|-------|
| ALN-HBV   | Background | 422   |
|           | mer8       | 57    |
|           | mer7-m8    | 121   |
|           | mer7-A1    | 72    |
|           | mer6       | 129   |
| ALN-HBV02 | Background | 73    |
|           | mer8       | 10    |
|           | mer7-m8    | 17    |
|           | mer7-A1    | 20    |
|           | mer6       | 33    |

Number of DEGs estimated relative to mock controls post-transfection in HepG2.2.15 cells at a false discovery rate <0.05.



**Table S12.** Magnitude of cumulative dysregulation of gene transcripts as measured in the CDF plots after treatment with **ALN-HBV** or **ALN-HBV02** at 10nM (n=4)

| siRNA            | Seed Match | CDF Shift |
|------------------|------------|-----------|
| <b>ALN-HBV</b>   | mer8       | -0.100*** |
|                  | mer7-m8    | -0.079*** |
|                  | mer7-A1    | -0.032*** |
|                  | mer6       | -0.013**  |
| <b>ALN-HBV02</b> | mer8       | -0.024*** |
|                  | mer7-m8    | -0.018*** |
|                  | mer7-A1    | -0.018*** |
|                  | mer6       | -0.009**  |

Significance of each relative to background is indicated as follows \*p < 0.05, \*\*p < 0.01, \*\*\*p < 0.001, \*\*\*\*p < 0.0001.

**Overview of published hAgo2 structural data**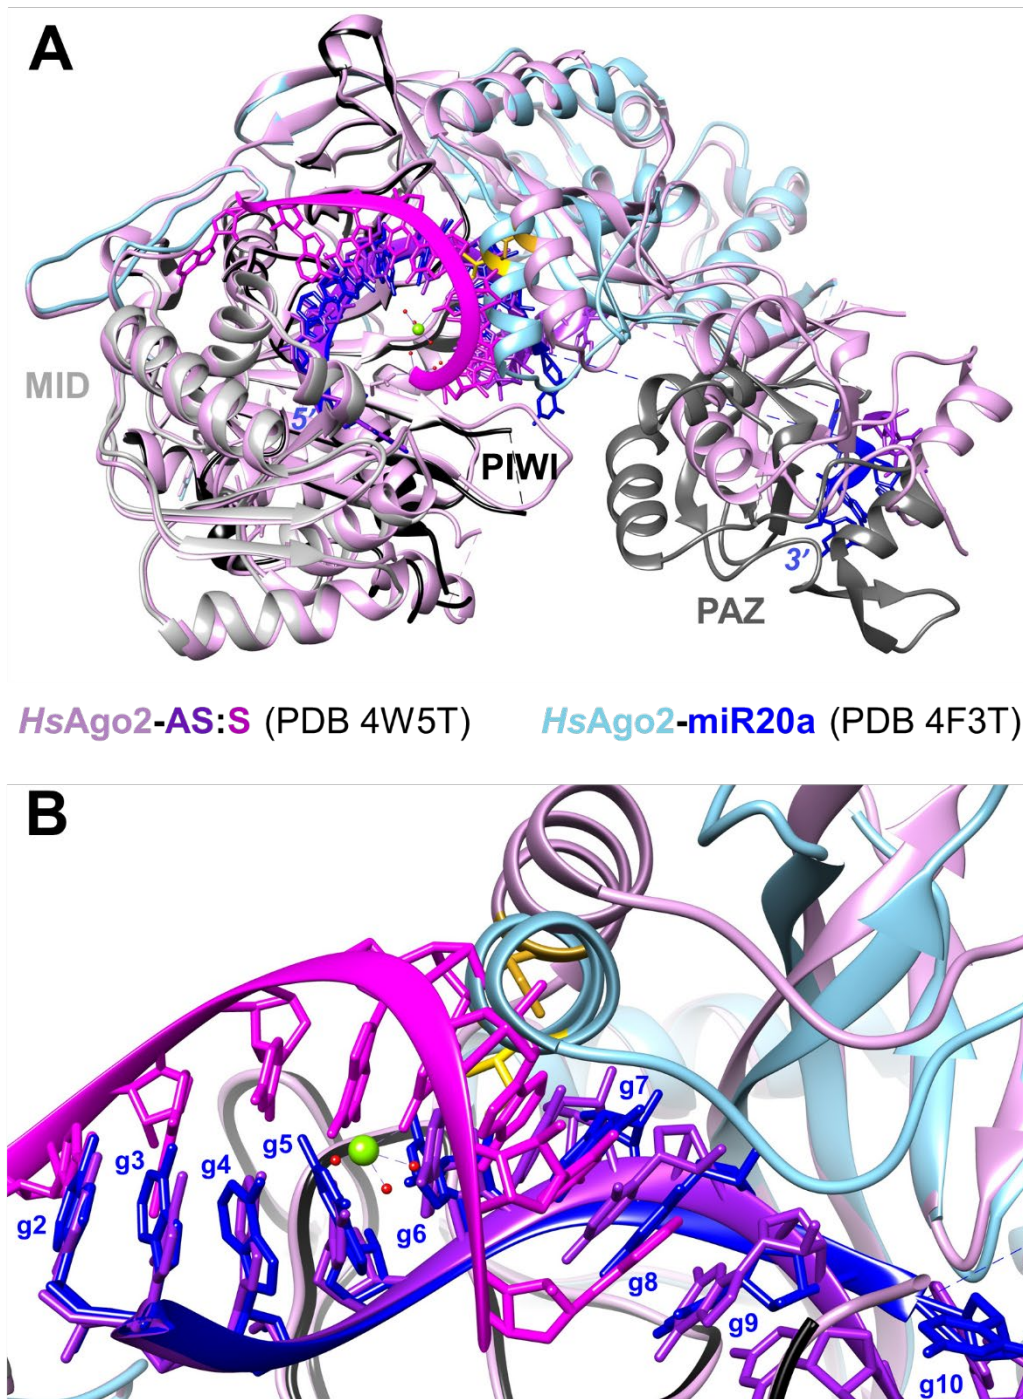

**Figure S25.** Overview of hAgo2 guide-only and guide-target structures. A) Global view of hAgo2 in guide-only (PDB ID 4F3T, (1)) and guide-target (PDB ID 4W5T, (2)) forms. B) Close up overlay of the two complexes, helix-7, and Ile365.

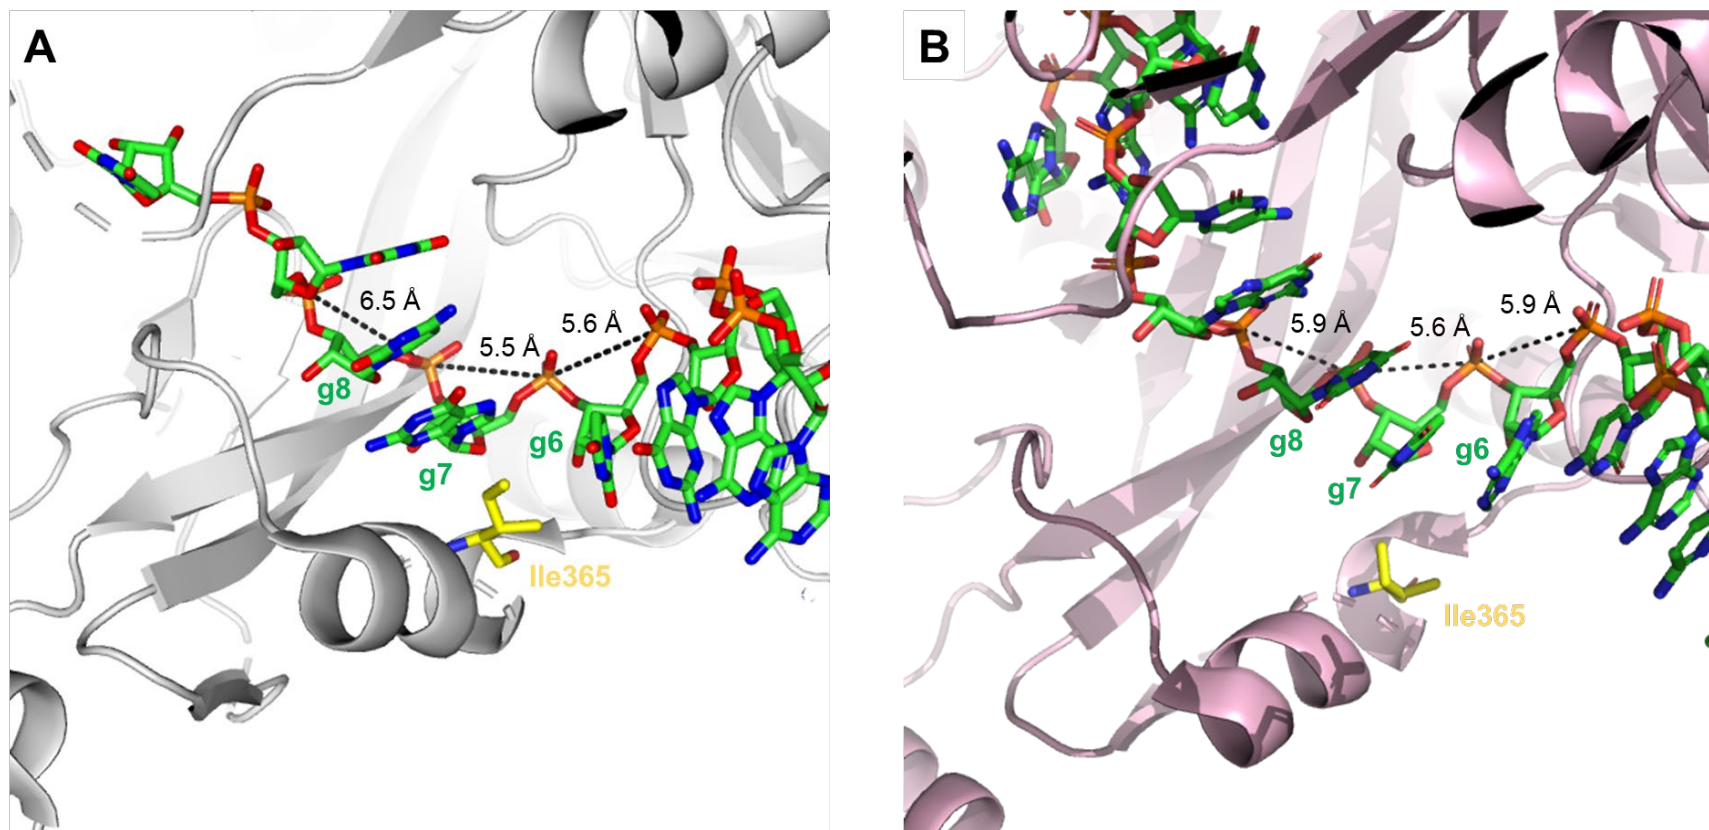

**Figure S26.** Overview of P-P distances between g5-g6, g6-g7, and g7-g8 in structures of Ago2 with guide only (A) or guide-target (B) complexes. Figures were generated using PyMol from PDB structures 4F3T (guide only, (1)) or 4W5T (guide-target, (2)).

**References**

1. Elkayam, E., Kuhn, C.-D., Tocilj, A., Haase, Astrid D., Greene, Emily M., Hannon, Gregory J. and Joshua-Tor, L. (2012) The Structure of Human Argonaute-2 in Complex with miR-20a. *Cell*, **150**, 100-110.
2. Schirle, N.T., Sheu-Gruttadauria, J. and MacRae, I.J. (2014) Structural basis for microRNA targeting. *Science*, **346**, 608-613.
